# Supplementary material for: Pericentromeric Non-Coding DNA Transcription Is Associated with Niche Impairment in Patients with Ineffective or Partially Effective Multiple Myeloma Treatment
Source: MDPI journal article supplement (doi:10.3390/ijms23063359), 2022-03-20
Supplement: s1 [file s1]

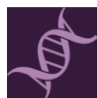

Article

# Pericentromeric Non-Coding DNA Transcription Is Associated with Niche Impairment in Patients with Ineffective or Partially Effective Multiple Myeloma Treatment

Natella I. Enukashvily <sup>1,2,\*</sup>, Natalia Semenova <sup>3,\*</sup>, Anna V. Chubar <sup>1</sup>, Dmitry I. Ostromyshenskii <sup>1</sup>, Ekaterina A. Gushcha <sup>1</sup>, Sergei Gritsaev <sup>3</sup>, Stanislav S. Bessmeltsev <sup>3</sup>, Viktor I. Rugal <sup>3</sup>, Egor M. Prikhodko <sup>4,5</sup>, Ivan Kostroma <sup>3</sup>, Anastasia Zherniakova <sup>3,†</sup>, Anastasia V. Kotova <sup>1</sup>, Liubov A. Belik <sup>1</sup>, Alexander Shumeev <sup>4,‡</sup>, Irina I. Maslennikova <sup>2,4</sup> and Dmitry I. Ivolgin <sup>2,4</sup>

- <sup>1</sup> Lab of the Non-coding DNA Studies, Institute of Cytology, Russian Academy of Sciences, 194064 St. Petersburg, Russia; annachubar95@incras.ru (A.V.C.); necroforus@gmail.com (D.I.O.); gushcha.ekaterina@gmail.com (E.A.G.); anastkotova@gmail.com (A.V.K.); l.a.belik@list.ru (L.A.B.)
  - <sup>2</sup> Cell Technologies Lab, North-Western State Medical University Named after I.I. Mechnikov, 191015 St. Petersburg, Russia; Irina.Maslennikova@szgmu.ru (I.I.M.); Dmitrii.Ivolgin@szgmu.ru (D.I.I.)
  - <sup>3</sup> Clinical Department, Russian Research Institute of Hematology and Transfusiology FMBA of Russia, 191024 St. Petersburg, Russia; gritsaevsv@mail.ru (S.G.); bessmeltsev@yandex.ru (S.S.B.); sciencerugal@gmail.com (V.I.R.); obex@rambler.ru (I.K.); nasta2045@yandex.ru (A.Z.)
  - <sup>4</sup> Pokrovsky Stem Cell Bank, LLC, 199106 St. Petersburg, Russia; ceo@pokrovcell.ru (E.M.P.); a-shu@yandex.ru (A.S.)
  - <sup>5</sup> Faculty of Clinical Propaedeutics, North-Western State Medical University Named after I.I. Mechnikov, 191015 St. Petersburg, Russia
- \* Correspondence: n.enukashvily@incras.ru (N.I.E.); semenova@mlc-lab.ru (N.S.)
- † Present affiliation: Clinica Universidad de Navarra, Centro de Investigacion Medica Aplicada (CIMA), Instituto de Investigacion Sanitaria de Navarra (IDISNA), 31008 Pamplona, Spain
- ‡ Present affiliation: Core Facility for Cell Technologies and Immunology, 'Sirius' University, 354340 Sochi, Russia

**Citation:** Enukashvily, N.; Semenova, N.; Chubar, A.; Ostromyshenskii, D.; Gushcha, E.; Gritsaev, S.; Bessmeltsev, S.; Rugal, V.; Prikhodko, E.; Kostroma, I.; et al. Pericentromeric Non-Coding DNA Transcription Is Associated with Niche Impairment in Patients with Ineffective or Partially Effective Multiple Myeloma Treatment. *Int. J. Mol. Sci.* **2022**, *23*, 3359. <https://doi.org/10.3390/ijms23063359>

Academic Editor: Arianna Scuteri

Received: 21 February 2022

Accepted: 17 March 2022

Published: 20 March 2022

**Publisher's Note:** MDPI stays neutral with regard to jurisdictional claims in published maps and institutional affiliations.

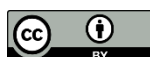

**Copyright:** © 2022 by the authors. Licensee MDPI, Basel, Switzerland. This article is an open access article distributed under the terms and conditions of the Creative Commons Attribution (CC BY) license (<https://creativecommons.org/licenses/by/4.0/>).

## Supplementary Material

**Supplementary Table S1.** The number of cells expressing positive and negative markers of MSC in cultures obtained from HD and MM patients with different PC percentage.

| Surface antigens               |       | MM-MSC from PoCR patients | MM-MSC from NR patients | HD-MSC     |
|--------------------------------|-------|---------------------------|-------------------------|------------|
| Markers of MSC                 | CD44  | 97,9 ± 4,9                | 99,4 ± 0,9              | 97,5 ± 2,3 |
|                                | CD73  | 98,7 ± 3,2                | 99,2 ± 1,3              | 95 ± 3,2   |
|                                | CD90  | 98,4 ± 3,3                | 97,5 ± 2,8              | 99 ± 0,4   |
|                                | CD105 | 98,1 ± 4,5                | 99,2 ± 1,4              | 93,3 ± 6,5 |
| Markers of hematological cells | CD14  | 3,3 ± 3,2                 | 0,7 ± 0,6               | 1,5 ± 0,8  |
|                                | CD34  | 0,3 ± 0,8                 | 0,6 ± 1,1               | 3,1 ± 2,8  |
|                                | CD45  | 2,3 ± 2,5                 | 0 ± 0                   | 1,9 ± 1,6  |
|                                | CD117 | 2,7 ± 3,4                 | 1,1 ± 1,1               | 1,1 ± 0,4  |

**Abbreviations:** HD = healthy donors; HD-MSC = mesenchymal stromal cells from healthy donors; MSC = mesenchymal stromal cells; MM = multiple myeloma; MM-MSC = mesenchymal stromal cells from multiple myeloma patients; NR = non-responder; PC = plasma cells; PoCR = partial or complete response.

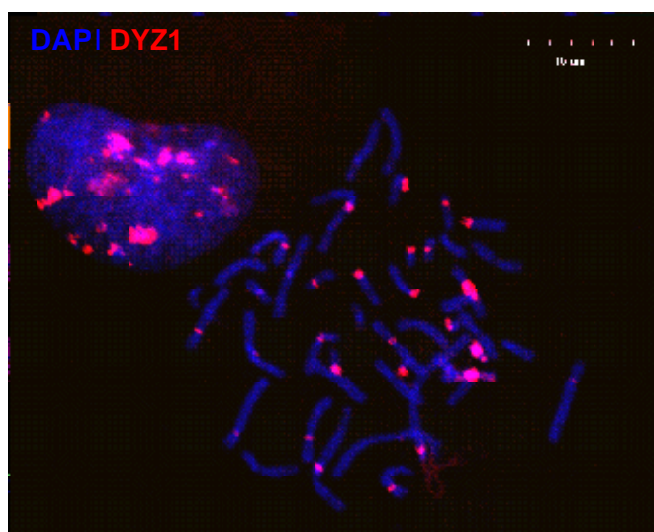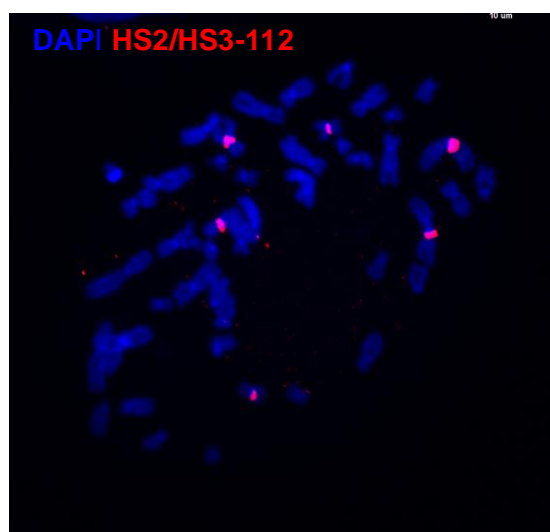

**Supplementary Figure S1.** Chromosome specificity of two HS2/HS3 probes (red) used in the study. DNA-DNA FISH was performed on metaphase plates as described in Materials and Methods.
